# Supplementary material for: Assessment of Facial Morphologic Features in Patients With Congenital Adrenal Hyperplasia Using Deep Learning
Source: PubMed Central journal article supplement (PMC7675110; doi:10.1001/jamanetworkopen.2020.22199), 2020-11-18
Supplement: jamanetwopen-e2022199-s001.pdf [file jamanetwopen-e2022199-s001.pdf]

## Supplemental Online Content

AbdAlmageed W, Mirzaalian H, Guo X, et al. Assessment of facial morphologic features in patients with congenital adrenal hyperplasia using deep learning. *JAMA Netw Open*. 2020;3(11):e2022199. doi:10.1001/jamanetworkopen.2020.22199

**eFigure 1.** Visualization of the 68 facial landmarks considered in our facial analysis

**eFigure 2.** Definitions of the 27 handcrafted features considered in our facial analysis

**eTable 1.** Data distribution per fold of 6-fold partitioning strategy for CAH and controls

**eTable 2.** Euclidean features and measurements in CAH versus controls

**eFigure 3.** Feature maps of the VGG16 model layers in the deep neural network

**eFigure 4.** Regionwise facial analysis of different regions (upper face, lower face, region around eyes, region around nose, and region around mouth)

This supplemental material has been provided by the authors to give readers additional information about their work.

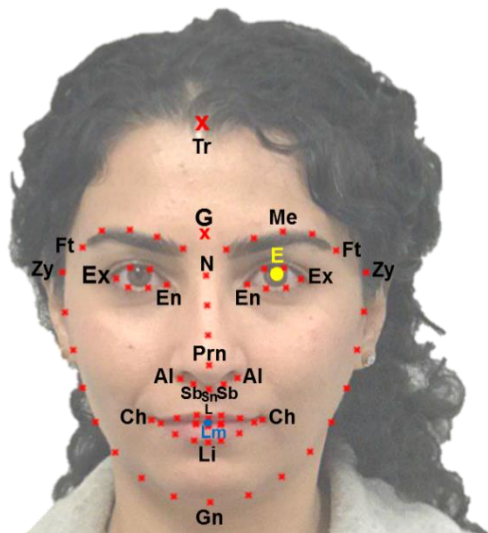

| <b>Landmark</b> | <b>Name</b>      | <b>Definition</b>                                                                                                                |
|-----------------|------------------|----------------------------------------------------------------------------------------------------------------------------------|
| <b>G</b>        | Glabella         | The most convex sagittal midline point between the eyebrows                                                                      |
| <b>Ft</b>       | Frontotemporale  | The point of concavity on each side of the forehead above the supraorbital rim, lateral to the elevation of the linea temporalis |
| <b>Gn</b>       | Gnathion         | The lowest median landmark on the inferior aspect of the mandible                                                                |
| <b>En</b>       | Endocanthion     | The most medial point of the palpebral fissure, at the inner commissure of the eye                                               |
| <b>Ex</b>       | Exocanthion      | The most lateral point of the palpebral fissure, at the outer commissure of the eye                                              |
| <b>N</b>        | Nasion           | The sagittal midline point of the nasal root at the nasofrontal suture                                                           |
| <b>Al</b>       | Alare            | The most lateral extents of the alar contours                                                                                    |
| <b>Prn</b>      | Pronasale        | The most protrusive point of the nasal tip (apex nasi)                                                                           |
| <b>Ch</b>       | Cheilion         | The most lateral points at the labial commissure                                                                                 |
| <b>L</b>        | Labiale superius | The midline point of the upper lip (at the upper vermilion line)                                                                 |
| <b>Li</b>       | Labiale inferius | The midline point of the lower lip (at the lower vermilion line)                                                                 |
| <b>Zy</b>       | Zygion           | The most lateral extents of the zygomatic arches                                                                                 |
| <b>Sn</b>       | Subnasal         | The lowest point of the nose, above the lip                                                                                      |
| <b>Sb</b>       |                  | Midpoint between Al and Sn                                                                                                       |
| <b>Lm</b>       |                  | Cross-section of upper and lower lip with horizontal line of the lip                                                             |
| <b>E</b>        |                  | Midpoint of the eye                                                                                                              |
| <b>Me</b>       |                  | Midpoint of the eyebrow                                                                                                          |
| <b>Tr</b>       |                  | Top of the forehead                                                                                                              |

**eFigure 1.** Visualization of 68 facial landmarks considered in our facial analysis.

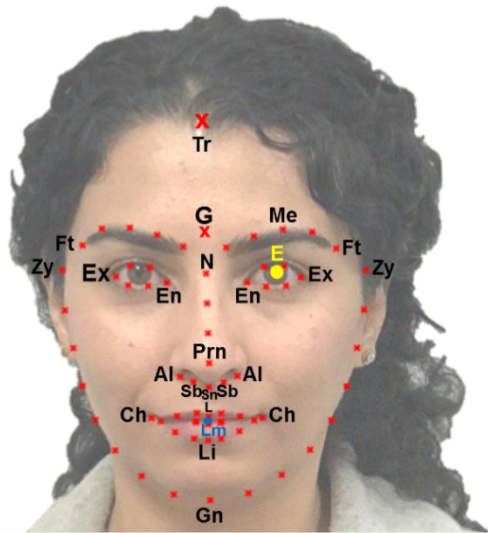

| <b>Feature #</b> | <b>Feature description</b>                                                  | <b>Feature #</b> | <b>Feature description</b>                                                    |
|------------------|-----------------------------------------------------------------------------|------------------|-------------------------------------------------------------------------------|
| #1               | $\mathcal{L}(Ex_l, En_l) / \mathcal{L}(Zy_l, Zy_r)$                         | #15              | $\mathcal{L}(Lm, Li) / \mathcal{L}(Zy_l, Zy_r)$                               |
| #2               | $\mathcal{L}(En_l, En_r) / \mathcal{L}(Zy_l, Zy_r)$                         | #16              | $\mathcal{L}(Ft_l, Ft_r) / \mathcal{L}(Zy_l, Zy_r)$                           |
| #3               | $\mathcal{L}(Al_l, Al_r) / \mathcal{L}(Zy_l, Zy_r)$                         | #17              | $\mathcal{L}(Tr_r, G) / \mathcal{L}(Zy_l, Zy_r)$                              |
| #4               | $\mathcal{L}(Ch_l, Ch_r) / \mathcal{L}(Zy_l, Zy_r)$                         | #18              | $\mathcal{L}(N, Prn) / \mathcal{L}(Zy_l, Zy_r)$                               |
| #5               | $\mathcal{L}(N, Lm) / \mathcal{L}(Zy_l, Zy_r)$                              | #19              | $\mathcal{L}(Lm, Gn) / \mathcal{L}(Zy_l, Zy_r)$                               |
| #6               | $\mathcal{L}(Ex_l, Ex_r) / \mathcal{L}(Zy_l, Zy_r)$                         | #20              | $\mathcal{L}(Sb_l, Sb_r) / \mathcal{L}(Zy_l, Zy_r)$                           |
| #7               | $\mathcal{L}(N, Sn) / \mathcal{L}(Zy_l, Zy_r)$                              | #21              | $(\mathcal{L}(Sb_l, Prn) + \mathcal{L}(Sb_r, Prn)) / \mathcal{L}(Zy_l, Zy_r)$ |
| #8               | $(\mathcal{L}(Sb_l, Sn) + \mathcal{L}(Sb_r, Sn)) / \mathcal{L}(Zy_l, Zy_r)$ | #22              | $\mathcal{L}(Ex, Gn) / \mathcal{L}(Tr, Gn)$                                   |
| #9               | $\mathcal{L}(Sn, Prn) / \mathcal{L}(Zy_l, Zy_r)$                            | #23              | $\mathcal{L}(Zy_l, Zy_r) / \mathcal{L}(Tr, Gn)$                               |
| #10              | $\mathcal{L}(En_l, N) / \mathcal{L}(Zy_l, Zy_r)$                            | #24              | $\mathcal{L}(Zy_l, Zy_r) / \mathcal{L}(Ex, Gn)$                               |
| #11              | $\mathcal{L}(Ex_l, N) / \mathcal{L}(Zy_l, Zy_r)$                            | #25              | $\mathcal{L}(Ex_l, Ex_r) / \mathcal{L}(En_l, En_r)$                           |
| #12              | $\mathcal{L}(Sn, Lm) / \mathcal{L}(Zy_l, Zy_r)$                             | #26              | $\mathcal{L}(Me, E) / \mathcal{L}(Tr, Gn)$                                    |
| #13              | $\mathcal{L}(Sn, L) / \mathcal{L}(Zy_l, Zy_r)$                              | #27              | $\mathcal{L}(Tr, Gn) / \mathcal{L}(Zy_l, Zy_r)$                               |
| #14              | $\mathcal{L}(L, Lm) / \mathcal{L}(Zy_l, Zy_r)$                              |                  |                                                                               |

**eFigure 2.** Definitions of 27 handcrafted features considered in our facial analysis.

**eTable 1. Data distribution per fold of 6-fold partitioning strategy for CAH and controls**

|             | <u>CONTROL</u> |               | <u>CONTROL*</u> |               | <u>CAH</u>     |               |
|-------------|----------------|---------------|-----------------|---------------|----------------|---------------|
| <b>Fold</b> | <b>Subject</b> | <b>Sample</b> | <b>Subject</b>  | <b>Sample</b> | <b>Subject</b> | <b>Sample</b> |
| Fold#0      | 10             | 72            | 14              | 117           | 17             | 182           |
| Fold#1      | 10             | 66            | 14              | 122           | 17             | 164           |
| Fold#2      | 10             | 71            | 14              | 212           | 17             | 153           |
| Fold#3      | 10             | 91            | 14              | 307           | 17             | 155           |
| Fold#4      | 10             | 97            | 14              | 136           | 17             | 195           |
| Fold#5      | 9              | 49            | 15              | 184           | 17             | 144           |

Number of unique subjects and total number of sample images per fold

Controls include participants tested in clinic (CONTROL) as well as control data selected from publicly available datasets (CONTROL\*).

**eTable 2. Euclidean features and measurements in CAH versus controls**

| <b>Feature#</b> | <b>Feature description</b>                                                    | <b>P</b> |
|-----------------|-------------------------------------------------------------------------------|----------|
| #1              | $\mathcal{L}(Ex_l, En_l) / \mathcal{L}(Zy_l, Zy_r)$                           | 0.000    |
| #2              | $\mathcal{L}(En_l, En_r) / \mathcal{L}(Zy_l, Zy_r)$                           | 0.545    |
| #3              | $\mathcal{L}(Al_l, Al_r) / \mathcal{L}(Zy_l, Zy_r)$                           | 0.044    |
| #4              | $\mathcal{L}(Ch_l, Ch_r) / \mathcal{L}(Zy_l, Zy_r)$                           | 0.311    |
| #5              | $\mathcal{L}(N, Lm) / \mathcal{L}(Zy_l, Zy_r)$                                | 0.000    |
| #6              | $\mathcal{L}(Ex_l, Ex_r) / \mathcal{L}(Zy_l, Zy_r)$                           | 0.008    |
| #7              | $\mathcal{L}(N, Sn) / \mathcal{L}(Zy_l, Zy_r)$                                | 0.000    |
| #8              | $(\mathcal{L}(Sb_l, Sn) + \mathcal{L}(Sb_r, Sn)) / \mathcal{L}(Zy_l, Zy_r)$   | 0.113    |
| #9              | $\mathcal{L}(Sn, Prn) / \mathcal{L}(Zy_l, Zy_r)$                              | 0.485    |
| #10             | $\mathcal{L}(En_l, N) / \mathcal{L}(Zy_l, Zy_r)$                              | 0.055    |
| #11             | $\mathcal{L}(Ex_l, N) / \mathcal{L}(Zy_l, Zy_r)$                              | 0.002    |
| #12             | $\mathcal{L}(Sn, Lm) / \mathcal{L}(Zy_l, Zy_r)$                               | 0.082    |
| #13             | $\mathcal{L}(Sn, L) / \mathcal{L}(Zy_l, Zy_r)$                                | 0.060    |
| #14             | $\mathcal{L}(L, Lm) / \mathcal{L}(Zy_l, Zy_r)$                                | 0.695    |
| #15             | $\mathcal{L}(Lm, Li) / \mathcal{L}(Zy_l, Zy_r)$                               | 0.189    |
| #16             | $\mathcal{L}(Ft_l, Ft_r) / \mathcal{L}(Zy_l, Zy_r)$                           | 0.010    |
| #17             | $\mathcal{L}(Tr_r, G) / \mathcal{L}(Zy_l, Zy_r)$                              | 0.126    |
| #18             | $\mathcal{L}(N, Prn) / \mathcal{L}(Zy_l, Zy_r)$                               | 0.000    |
| #19             | $\mathcal{L}(Lm, Gn) / \mathcal{L}(Zy_l, Zy_r)$                               | 0.077    |
| #20             | $\mathcal{L}(Sb_l, Sb_r) / \mathcal{L}(Zy_l, Zy_r)$                           | 0.107    |
| #21             | $(\mathcal{L}(Sb_l, Prn) + \mathcal{L}(Sb_r, Prn)) / \mathcal{L}(Zy_l, Zy_r)$ | 0.703    |
| #22             | $\mathcal{L}(Ex, Gn) / \mathcal{L}(Tr, Gn)$                                   | 0.127    |
| #23             | $\mathcal{L}(Zy_l, Zy_r) / \mathcal{L}(Tr, Gn)$                               | 0.001    |
| #24             | $\mathcal{L}(Zy_l, Zy_r) / \mathcal{L}(Ex, Gn)$                               | 0.025    |
| #25             | $\mathcal{L}(Ex_l, Ex_r) / \mathcal{L}(En_l, En_r)$                           | 0.033    |
| #26             | $\mathcal{L}(Me, E) / \mathcal{L}(Tr, Gn)$                                    | 0.347    |
| #27             | $\mathcal{L}(Tr, Gn) / \mathcal{L}(Zy_l, Zy_r)$                               | 0.117    |

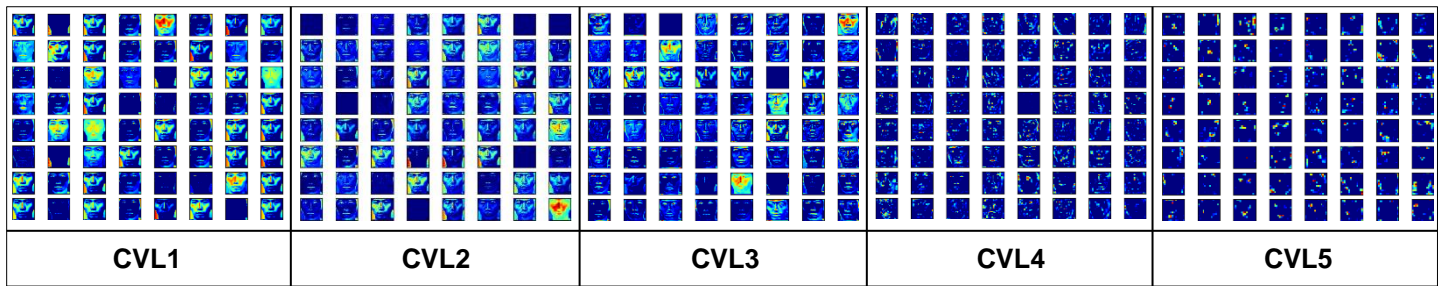

**eFigure 3.** Feature maps of the VGG16 model layers (CVL1, CVL2, CVL3, CVL4, and CVL5 depicted in Figure 1). It can be seen that as we move from earlier layers to the deeper ones (CVL1 to CVL5), the features are moved from low level features (like edges) to high level features, and high level features are not easy to interpret.

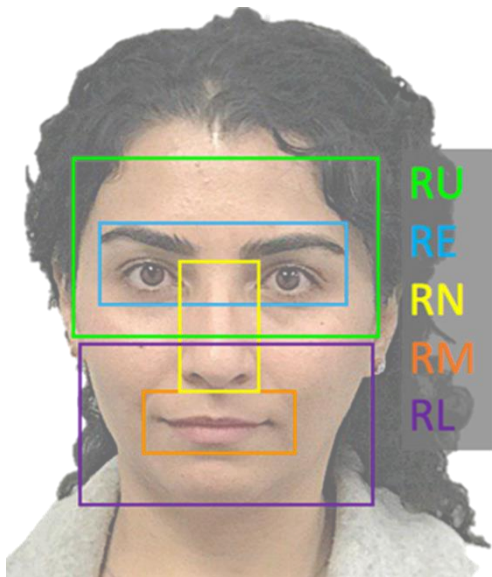

|    | AUC         |
|----|-------------|
| RU | 0.71 ± 0.13 |
| RL | 0.79 ± 0.14 |
| RN | 0.69 ± 0.17 |
| RE | 0.82 ± 0.09 |
| RM | 0.80 ± 0.14 |

**eFigure 4.** Regionwise facial analysis of five different regions: upper face region (RU), lower face region (RL), region around eyes (RE), region around nose (RN), and region around mouth (RM). To find the importance of each facial region, we blocked one region at a time to assess the drop in performance with each blocked region that was not passed to the neural network. The area under the curve (AUC) is listed (mean ± SD) per region, with a lower AUC signifying a greater impact of hiding the region.
